# Supplementary material for: A Neutrophil-Driven Inflammatory Signature Characterizes the Blood Transcriptome Fingerprint of Psoriasis
Source: Front Immunol. 2020 Nov 24;11:587946. doi: 10.3389/fimmu.2020.587946 (PMC7732684; doi:10.3389/fimmu.2020.587946)
Supplement: Supplementary file 2 [file Table_1.xlsx]

## Sheet: Sheet1
Items	ID	Aggregate number	Aggregate location	Module title	Number of unique genes	Module Probe IDs	Member genes	Literature Lab Top Associations	GSAnRes annotation	GSAn Results	Top DAVID annotation cluster	Enrichment Score	Top matched pathway in KEGG	Enrichment p-value	Gene Count	Top matched pathway in BIOCARTA	Enrichment p-value	Gene Count	Top matched OMIM	Enrichment p-value	Gene Count	Top GOTERM BP	Enrichment p-value	Gene Count	Top GOTERM MF	Enrichment p-value	Gene Count	Top matched Chaussabel gen2 module	Annotation of gen2 module	Gene Count	Percent of module	Top matched Emory module	Annotation of Emory module	Gene Count	Percent of module
24	M12.10	A35	6	Inflammation	53	2367165, 1680996, 1664644, 2205963, 1782050, 1812618, 1790689, 1728478, 1662741, 2353633, 1744508, 1788213, 1670926, 1807662, 1653498, 1768505, 2254635, 1673282, 1784884, 1746012, 1722218, 2214678, 1681239, 2334693, 2112988, 1705064, 2331266, 1653292, 2362858, 1677843, 1813489, 1729294, 2363065, 1758146, 1657129, 1695962, 1810514, 1672834, 1659544, 1671404, 2282641, 1721876, 1657892, 1674402, 168…	ABTB1, ALOX5, ATG16L2, C10ORF54, CEBPD, CENTD3, CRISPLD2, CXCL16, EDG4, EMR2, FAM53C, FRAT2, GALNAC4S-6ST, IGF2R, IGSF6, IL13RA1, ITGAX, LAMP2, LILRB3, MBD6, MBOAT7, MXD1, MYO1F, NARF, NCF1C, NDEL1, NUMB, PFKFB4, PILRA, RAB24, RAF1, RNF130, RTN3, SIRPA, SKAP2, SLC12A9, SLC25A44, SSH2, STX3, SVIL, TBXAS1, TIMP2, TLR8, TMEM71, TNFRSF1A, TSEN34, TSEN34, UBN1, ULK1, ULK1, USP10, XPO6, ZNF467, ZNF746,…	Arachidonic Acids/Fatty Acids, Essential/Arachidonic Acid	protein-containing complex assembly, signal transduction, autophagy, protein transport, proteolysis, cellular protein modification process, transcription by RNA polymerase II, neutrophil degranulation	link	innate immune response (GOTERM_BP_FAT), defense response (GOTERM_BP_FAT), immune response (GOTERM_BP_FAT), signal (SP_PIR_KEYWORDS)	1.69152		NA	NA	Aspirin Blocks Signaling Pathway Involved in Platelet Activation	0.993538	2	Many sequence variants affecting diversity of adult human height	0.769747	3	regulation of cell morphogenesis	0.990409	4	lipid binding	0.999806	5	M4.13	Inflammation	16	29.09	M11.0	enriched in monocytes (II)	16	0.301887
30	M13.1	A35	3	Inflammation	137	1802096, 1738921, 1714197, 1703538, 1689908, 1709820, 1659463, 2382657, 1670130, 1795826, 1703123, 1750401, 2283388, 1652631, 1765858, 1768870, 2326512, 1693552, 1800540, 1748883, 1671893, 2414027, 1663142, 2403228, 2399363, 1709204, 1714759, 1720708, 1736190, 1807455, 1669502, 1784737, 1651832, 2378100, 1693650, 2368318, 1683658, 1726222, 1683146, 2134538, 2173835, 2347949, 1343295, 1724250, 181…	ABTB1, ACAA1, ACSS2, AIF1, ANKRD13A, AOAH, APAF1, ARHGAP9, ARID3A, ATP6V0D1, AXUD1, C17ORF62, C20ORF24, C9ORF19, CAB39, CAPZA2, CASP1, CD300A, CD55, CDKN2D, CHMP2A, CKLF, CLEC12A, CLEC12A, CLEC4A, CLEC4A, CNIH4, CSNK1D, CYP4F3, DHRS7, E2F3, EDG6, EHD1, FBXL5, FES, FGR, FKBP1A, FLOT2, FTH1, FTHL11, FTHL3, G6PD, GAPDH, GRN, GRN, HIST1H2BK, HMGB2, HSPA1B, IFNGR1, IL10RB, IMPDH1, IQGAP1, KIAA1949, LA…	Mitogen-Activated Protein Kinase 1/Mitogen-Activated Protein Kinase 3/ERK1	organelle assembly, multicellular organism development, cellular protein modification process, transcription by RNA polymerase II, mitotic cell cycle phase transition, intrinsic apoptotic signaling pathway, cell projection morphogenesis, activation of innate immune response, autophagy, activation of protein kinase activity, phosphorylation, protein-containing complex assembly, intracellular trans…	link	phosphoprotein (SP_PIR_KEYWORDS), cytoplasm (SP_PIR_KEYWORDS), acetylation (SP_PIR_KEYWORDS)	3.87243	Acute myeloid leukemia	0.27204	5	Erk1/Erk2 Mapk Signaling pathway	0.921499	4		NA	NA	regulation of cell proliferation	0.146571	19	structure-specific DNA binding	0.90476	6	M4.6	Inflammation	32	21.77	M11.0	enriched in monocytes (II)	17	0.124088
32	M13.3	A35	16	TBD	100	2336595, 1667748, 1767816, 1703471, 1790978, 1806999, 1713402, 1771003, 1741881, 1807540, 2392274, 1772233, 1658121, 1745954, 2376455, 1661196, 1804854, 1674038, 2278636, 2233366, 1793743, 1790985, 1711909, 1736048, 1773125, 1744963, 1720158, 1789596, 1651628, 1775498, 1661755, 2362293, 2366334, 1778444, 1697559, 2052208, 1745994, 2364110, 1755123, 1789702, 1773963, 1696003, 1658928, 1764396, 173…	ACSS2, ANKRD33, APH1B, ATF6, ATG7, B9D2, C11ORF56, C14ORF94, C9ORF72, CBARA1, CD82, CENTD2, CFP, CORO1C, CSF2RA, CSF2RA, CTNNA1, CTSD, CUTL1, DDEF1, DIRC2, DJ341D10.1, EDEM2, ELL, ENTPD1, ERO1L, ETS2, ETV6, EXOC6, FAM100B, FAM129B, FBXO38, FERMT3, FKBP5, G6PD, GADD45A, GAS7, GBA, GBA, GBE1, GNA15, GNAI3, GNB2, HDAC4, HIATL1, HK2, HK2, HLX, HMGB2, HSDL2, IER3, IRS2, KBTBD7, KIAA0513, LOC644642, LO…	Arsenicals/Starch/Arsenicals	organophosphate metabolic process, protein-containing complex assembly, signal transduction, transcription, DNA-templated, intracellular transport, response to other organism, protein transport, cellular protein modification process, neutrophil degranulation, cellular response to stress, plasma membrane bounded cell projection assembly, cellular response to chemical stimulus, cellular protein loc…	link	hexose metabolic process (GOTERM_BP_FAT), glucose metabolic process (GOTERM_BP_FAT), monosaccharide metabolic process (GOTERM_BP_FAT), glucose metabolism (SP_PIR_KEYWORDS), carbohydrate metabolism (SP_PIR_KEYWORDS), Starch and sucrose metabolism (KEGG_PATHWAY), Type II diabetes mellitus (KEGG_PATHWAY), glucose catabolic process (GOTERM_BP_FAT), hexose catabolic process (GOTERM_BP_FAT), cellular c…	1.625	Dorso-ventral axis formation	0.590217	3		NA	NA		NA	NA	hexose metabolic process	0.0915938	8	oxidoreductase activity, acting on sulfur group of donors	0.961361	3	M4.6	Inflammation	16	15.09	M11.0	enriched in monocytes (II)	7	0.07
41	M13.12	A35	7	Inflammation	55	1684585, 1708934, 1681301, 1701603, 1694548, 1685824, 1765880, 1762713, 1761566, 1695157, 1716815, 2371724, 1808979, 1679826, 1663119, 1810420, 1709233, 2176063, 2391051, 1730454, 2230862, 2144426, 1768973, 1670302, 2092850, 1889841, 1913678, 1781700, 1721762, 1774874, 1661695, 1675756, 1701837, 2357419, 1660624, 1806293, 2126706, 1767377, 1683250, 1801254, 1679620, 1796316, 1796976, 2186061, 207…	ACSL1, ADM, AIM2, ALPL, ANXA3, B4GALT5, C16ORF57, C19ORF59, C5ORF32, CA4, CEACAM1, CEACAM1, CLEC4D, CST7, DSC2, DYSF, F5, FCGR1A, FCGR1B, FOLR3, GYG1, HIST2H2AA3, HIST2H2AC, HK3, HPSE, HS.150808, HS.407903, IL18R1, IL18RAP, IL1RN, IRAK3, KCNJ15, KLHL2, LILRA5, LIMK2, LIN7A, LMNB1, LOC153561, LOC440731, LOC648984, LOC728519, MMP9, NLRC4, PFKFB3, PGS1, PROK2, RGL4, S100A12, SIGLEC5, SIPA1L2, SLC22A…	Receptors, Interleukin-18/Doxycycline/Tetracyclines	cytokine secretion, protein metabolic process, signal transduction, activation of innate immune response, response to glucocorticoid, lipid metabolic process, neutrophil degranulation, leukocyte migration, positive regulation of NF-kappaB transcription factor activity, cellular response to chemical stimulus	link	response to wounding (GOTERM_BP_FAT), glycoprotein (SP_PIR_KEYWORDS), immune response (GOTERM_BP_FAT), signal (SP_PIR_KEYWORDS), inflammatory response (GOTERM_BP_FAT), defense response (GOTERM_BP_FAT), disulfide bond (SP_PIR_KEYWORDS), innate immune response (GOTERM_BP_FAT), Immunoglobulin domain (SP_PIR_KEYWORDS), immune response (SP_PIR_KEYWORDS), Signal-anchor (SP_PIR_KEYWORDS), Secreted (SP_P…	2.25969	Systemic lupus erythematosus	0.879007	3		NA	NA	Newly identified genetic risk variants for celiac disease related to the immune response	0.924306	2	response to wounding	0.00216498	11	IgG binding	0.971645	2	M4.2	Inflammation	18	31.58	M37.0	immune activation - generic cluster	23	0.418182
45	M13.16	A35	2	Cytokines/chemokines	39	2078697, 1715068, 1651826, 1737314, 1676895, 1778059, 1722158, 1742601, 1731714, 1798475, 1791253, 1797895, 2392569, 1725471, 2393296, 1750497, 1677693, 1765941, 1798977, 1815054, 1680397, 2396903, 1780334, 1791545, 2367671, 1670410, 1712999, 1700855, 1674590, 1776483, 1665540, 1805228, 1803984, 1792682, 1714643, 1653871, 1757361, 2205882, 1696187, 2112524, 2114720, 1772036, 1654560	ALPK1, AQP9, BASP1, BCL6, BTNL8, CASP4, CASP5, CR1, CREB5, CSF2RB, FBXL13, FFAR2, FPR2, GK, GK, GPR109A, GPR109B, GPR97, GPR97, GPR97, IL8RB, KCNJ15, KCNJ2, KRT23, LIMK2, LOC641710, LOC642103, LOC642684, LOC652578, LOC728417, LOC728417, LRG1, MAK, MCTP2, MGAM, NAMPT, NCF4, NSUN7, PYGL, RNF149, SLPI, STEAP4, TLR6	Cryoprotective Agents/Nicotinic Acids/Glycerol	protein metabolic process, signal transduction, transcription, DNA-templated, cellular response to stress, neutrophil degranulation	link	polymorphism (SP_PIR_KEYWORDS), transmembrane (SP_PIR_KEYWORDS), membrane (SP_PIR_KEYWORDS), receptor (SP_PIR_KEYWORDS), transmembrane protein (SP_PIR_KEYWORDS), cell membrane (SP_PIR_KEYWORDS), inflammatory response (GOTERM_BP_FAT), g-protein coupled receptor (SP_PIR_KEYWORDS), duplication (SP_PIR_KEYWORDS), transducer (SP_PIR_KEYWORDS), glycoprotein (SP_PIR_KEYWORDS), response to wounding (GOTE…	1.30403	Starch and sucrose metabolism	0.898896	2		NA	NA		NA	NA	glucan catabolic process	0.998699	2	inward rectifier potassium channel activity	0.997051	2	M3.2	Inflammation	13	30.23	M37.0	immune activation - generic cluster	16	0.410256
51	M13.22	A35	10	Neutrophils	65	1683598, 1708348, 1718071, 1801710, 1710514, 1781580, 1733288, 1689836, 2148847, 1785268, 1714592, 1791576, 1703074, 1688158, 1692742, 1781285, 2225144, 2289849, 1666932, 1728639, 1795158, 1689046, 2092118, 2370872, 1791771, 1789074, 1752923, 1662524, 2094061, 2226917, 1752927, 1805192, 1659753, 2326953, 1713934, 1724822, 2072598, 1809173, 1719344, 1724533, 1739641, 2201966, 2335704, 1711786, 171…	ACSL4, ADAM8, AGTPBP1, APBB1IP, BCL3, BRI3, C1RL, C5AR1, C6ORF166, CD58, CDA, CHSY1, CPD, CYB5R4, DENND3, DUSP1, EIF4E3, FCGR2A, FCGR2A, FCGR3B, FGR, FLJ20273, FPR1, GRINA, HCK, HSPA1A, IFNAR1, IL8RA, IMPA2, KIAA0247, KIAA1600, KIAA1754, LAMP2, LAT2, LITAF, LOC399744, LOC401357, LOC729021, LOC730820, LY96, MTMR3, N4BP1, NCF4, NFE2, NLRP12, NPL, NPL, NUMB, PGCP, PPP4R1, PSCD4, RALB, REPS2, RNF13, …	FMLP/N-Formylmethionine/N-Formylmethionine	organelle assembly, protein-containing complex assembly, signal transduction, cellular protein modification process, transcription by RNA polymerase II, neutrophil degranulation, protein secretion, innate immune response, proteolysis, response to lipopolysaccharide, cellular response to cytokine stimulus, leukocyte chemotaxis	link	positive regulation of cytokine production (GOTERM_BP_FAT), positive regulation of interferon-gamma production (GOTERM_BP_FAT), immune response (GOTERM_BP_FAT), leukocyte mediated immunity (GOTERM_BP_FAT), regulation of cytokine production (GOTERM_BP_FAT), regulation of interferon-gamma production (GOTERM_BP_FAT), cell activation during immune response (GOTERM_BP_FAT), leukocyte activation during…	2.19524		NA	NA		NA	NA		NA	NA	response to bacterium	0.0293191	7	metallocarboxypeptidase activity	0.520506	3	M3.2	Inflammation	17	25	M11.0	enriched in monocytes (II)	15	0.230769
68	M14.7	A35	17	TBD	31	1668822, 1755954, 1669177, 1690939, 1673370, 1804863, 1764029, 1694075, 2396571, 1684746, 1683178, 1728392, 1651385, 1737498, 1763144, 1696962, 1673543, 1803464, 1677768, 2118864, 1731736, 1656335, 1675391, 2124471, 1761833, 1690625, 1735495, 1764826, 2231020, 1773380, 1746664	BATF, CPEB3, DHRS12, ECGF1, FBXL5, FKBP15, FLJ40448, GADD45A, GPR108, IPO11, JAK2, LOC255809, MFN2, MLKL, NEU1, PDZD8, PGM2, PHTF1, POR, RAB1A, RIN3, RIT1, SLC24A4, SLC36A1, SLC40A1, SLC9A8, TBC1D8, TFE3, TMEM185B, UNC13D, WSB2	Amino Acid Substitution/Splenomegaly/Placental Iron Metabolism	cellular protein modification process, transcription by RNA polymerase II, cellular response to stress, cellular cation homeostasis, intracellular signal transduction	link	protein import (GOTERM_BP_FAT), protein localization in organelle (GOTERM_BP_FAT), protein targeting (GOTERM_BP_FAT), nucleotide binding (GOTERM_MF_FAT), intracellular protein transport (GOTERM_BP_FAT), protein transport (GOTERM_BP_FAT), establishment of protein localization (GOTERM_BP_FAT), cellular protein localization (GOTERM_BP_FAT), cellular macromolecule localization (GOTERM_BP_FAT), acetyl…	0.937911		NA	NA		NA	NA		NA	NA	protein import	0.999925	3	inorganic cation transmembrane transporter activity	0.930739	3	M5.1	Inflammation	4	12.9	M37.0	immune activation - generic cluster	2	0.0645161
89	M14.28	A35	11	Neutrophils	20	2307656, 1802458, 1770161, 1693630, 1674394, 1669376, 2123743, 1707286, 1661439, 1685009, 1735552, 1786303, 1661631, 1726421, 1717207, 1712918, 2367418, 1794165, 2404154, 2338452, 1775708, 2309180, 2349658	AGTRAP, AGTRAP, BST1, C16ORF7, C20ORF3, DRAM, FCER1G, FLJ22662, FLOT1, ITGAM, KIF1B, LILRA3, LILRA3, METTL9, MMP25, NQO2, OSCAR, PGD, SERPINA1, SERPINA1, SLC2A3, SMARCD3, TSPO	RANKL/RANK/Neutrophil surface molecule/PMNs Cells	signal transduction, neutrophil degranulation, leukocyte migration, carboxylic acid metabolic process, protein phosphorylation	link	signal (SP_PIR_KEYWORDS), receptor (SP_PIR_KEYWORDS), membrane (SP_PIR_KEYWORDS), transmembrane protein (SP_PIR_KEYWORDS), disulfide bond (SP_PIR_KEYWORDS), immune response (GOTERM_BP_FAT), cell membrane (SP_PIR_KEYWORDS), transmembrane (SP_PIR_KEYWORDS), alternative splicing (SP_PIR_KEYWORDS)	1.04758		NA	NA		NA	NA		NA	NA		NA	NA		NA	NA	M3.2	Inflammation	9	39.13	M11.0	enriched in monocytes (II)	5	0.25
126	M14.65	A35	13	Monocytes	15	1721391, 1679195, 2387599, 2396444, 1756982, 1744604, 1761463, 1763452, 2234016, 1744517, 1764964, 2175912, 1716524, 1684306, 2081682, 1681679	ATP6V0B, C20ORF24, C20ORF24, CD14, CLIC1, CYBA, EFHD2, EVI2B, FTHL7, GNS, IFNGR2, ITGB2, RAB7A, S100A4, SMAP2, TSPO	rab5 GTP-Binding Proteins/Chloride Channels/methionyl-leucyl-phenylalanine	protein transport, neutrophil degranulation	link	defense response (GOTERM_BP_FAT), inflammatory response (GOTERM_BP_FAT), membrane (SP_PIR_KEYWORDS), response to wounding (GOTERM_BP_FAT), transmembrane (SP_PIR_KEYWORDS), disulfide bond (SP_PIR_KEYWORDS)	1.22172		NA	NA		NA	NA		NA	NA	defense response	0.788123	4		NA	NA	M5.1	Inflammation	5	31.25	M11.0	enriched in monocytes (II)	2	0.133333
135	M14.74	A35	18	TBD	14	1742230, 1794190, 2413808, 1662843, 2147517, 1712389, 1690963, 1691760, 1737308, 1807042, 1766094, 1678504, 2210601, 2103761, 1782444	BAZ1A, CCPG1, CD53, CD53, CD58, CKLF, DDEF1, FAM45A, GLRX, MARCKS, MOSPD2, RHOT1, RNASEL, TLE4, YIPF4	phorbol/Phorbol Esters/Phorbol Esters	cellular protein modification process	link	membrane (SP_PIR_KEYWORDS), transmembrane (SP_PIR_KEYWORDS)	1.28026	Fc gamma R-mediated phagocytosis	0.106998	2		NA	NA		NA	NA		NA	NA		NA	NA	M4.13	Inflammation	2	13.33			NA	NA
170	M15.26	A35	12	Neutrophils	38	1783956, 1655990, 1743570, 1706498, 1749892, 1683969, 1718977, 1774901, 1662846, 1779547, 1755075, 1686884, 1695246, 1768969, 2353358, 1656361, 1690063, 1676480, 2327090, 1756806, 2202915, 1763828, 1690125, 1652787, 1691508, 2374340, 2408543, 1739622, 1777342, 1665859, 2405797, 2338480, 1671281, 1659255, 1733997, 1807649, 1706217, 2323633, 1814296, 1743646	ATP8B4, CDK5RAP2, CEACAM3, DSE, EGLN1, FKBP1A, GADD45B, GDPD3, GPR160, HPSE, IDI1, IL1RAP, KLHDC8B, LBR, LGALS8, LOC201175, LOC651143, LOC654053, MAEA, MCL1, MLSTD1, MTF1, PDLIM7, PIK3AP1, PLAUR, PLAUR, PLAUR, PPP1R12A, PREX1, RAB27A, REPS2, RHOT1, RNASEL, RP2, SIRPB1, SPOPL, TLR4, TPD52L2, TRPM6, VASP	Proline/Proline/Hypoxia	protein-containing complex assembly, signal transduction, protein transport, cellular protein modification process, transcription by RNA polymerase II, neutrophil degranulation	link	cytoplasm (SP_PIR_KEYWORDS), cytoskeleton organization (GOTERM_BP_FAT), actin cytoskeleton organization (GOTERM_BP_FAT), cytoskeletal protein binding (GOTERM_MF_FAT), actin filament-based process (GOTERM_BP_FAT), cytoskeleton (SP_PIR_KEYWORDS), phosphoprotein (SP_PIR_KEYWORDS)	1.15892		NA	NA		NA	NA		NA	NA	leukocyte activation	0.999891	4	Rho GTPase activator activity	0.999932	2	M3.2	Inflammation	4	10	M11.0	enriched in monocytes (II)	4	0.105263
181	M15.37	A35	4	Inflammation	33	1736700, 2380418, 2326713, 2292178, 1810725, 2366330, 1740875, 1746525, 1757074, 1662799, 1792689, 1735367, 1775501, 1803560, 1769705, 1654518, 2231928, 1796642, 2119937, 2119945, 1682165, 1691717, 2320906, 1679133, 1766045, 2364022, 2406501, 2159453, 1683494, 1801307, 2260991, 1758864, 2337655, 1664802	ALDOA, BICD2, CD151, CLEC12A, FAM129A, FERMT3, FPR2, FTHL2, GNG10, GPSM3, HIST1H2AC, HSD17B11, IL1B, LAT2, LOC440093, LRCH4, MX2, NCF2, NDUFB3, NDUFB3, NT5C2, RHBDF2, RTN3, SERPINB1, SH3GLB1, SLC16A3, SOD2, STXBP2, TMEM154, TNFSF10, TSPO, VNN2, WARS, WSB1	Free Radical Scavengers/Monokines/Cytosol	signal transduction, neutrophil degranulation, leukocyte chemotaxis, protein phosphorylation, response to organonitrogen compound	link	apoptosis (GOTERM_BP_FAT), programmed cell death (GOTERM_BP_FAT), cell death (GOTERM_BP_FAT), death (GOTERM_BP_FAT), mitochondrion organization (GOTERM_BP_FAT), anti-apoptosis (GOTERM_BP_FAT), Apoptosis (SP_PIR_KEYWORDS), negative regulation of apoptosis (GOTERM_BP_FAT), mitochondrion (SP_PIR_KEYWORDS), negative regulation of programmed cell death (GOTERM_BP_FAT), negative regulation of cell deat…	1.13126		NA	NA		NA	NA		NA	NA	apoptosis	0.959803	6		NA	NA	M3.2	Inflammation	3	8.82	S4	Monocyte surface signature	5	0.151515
187	M15.43	A35	19	TBD	30	2359601, 1771664, 1806733, 1724474, 1722025, 1790781, 2280548, 1712721, 1801043, 1701403, 1687947, 1721127, 1845157, 1770994, 1661647, 1766487, 1654685, 1804738, 1744023, 2380605, 1713031, 2117623, 2340217, 1809850, 1696419, 1690754, 2234412, 1791511, 1661343, 2324421	CAMK2G, CLEC4E, COL18A1, COP1, CPEB4, DHRS13, FYB, GAST, GSN, HIP1, HIST1H2BE, HIST1H3D, HS.467586, LOC440900, LOC646144, LRRC25, MCTP1, MEFV, MGC18216, MTMR3, PGCP, PLXNC1, PTPRC, RCN3, STOM, SVIL, TLE3, TMEM176A, TNFSF14, TXNRD1	Amyloidosis/Phototransduction/Tubulin Modulators	protein metabolic process, protein-containing complex assembly, signal transduction, protein secretion, cellular response to chemical stimulus, leukocyte activation involved in immune response	link	phosphoprotein (SP_PIR_KEYWORDS), cellular macromolecular complex assembly (GOTERM_BP_FAT), cellular macromolecular complex subunit organization (GOTERM_BP_FAT), macromolecular complex assembly (GOTERM_BP_FAT), macromolecular complex subunit organization (GOTERM_BP_FAT), protein complex assembly (GOTERM_BP_FAT), protein complex biogenesis (GOTERM_BP_FAT), acetylation (SP_PIR_KEYWORDS), nucleus (S…	1.26176		NA	NA		NA	NA		NA	NA	cellular macromolecular complex assembly	0.996653	4	actin binding	0.553775	4	M5.14		5	16.67	M37.0	immune activation - generic cluster	4	0.133333
222	M15.78	A35	20	TBD	20	1794875, 1763837, 1794707, 1718982, 1773407, 1776788, 2323172, 2144573, 2144574, 1676665, 2151281, 1909770, 1652185, 1778111, 1737561, 1750429, 1781184, 1745262, 1696466, 1672589, 1720053	AGPAT9, ANPEP, ATHL1, BEST1, C16ORF72, C5ORF41, CSF3R, CTBS, CTBS, CUEDC1, GABARAPL1, HS.34558, IL4R, LOC441124, LOC88523, MKNK1, MYBPC3, REM2, ROPN1L, SEMA4B, ZFAND3	Adjuvants, Immunologic/Blast Crisis/Leukemia, Myeloid	signal transduction, organonitrogen compound metabolic process	link	Hematopoietic cell lineage (KEGG_PATHWAY), phosphoprotein (SP_PIR_KEYWORDS), transmembrane protein (SP_PIR_KEYWORDS), cell membrane (SP_PIR_KEYWORDS), polymorphism (SP_PIR_KEYWORDS), membrane (SP_PIR_KEYWORDS), alternative splicing (SP_PIR_KEYWORDS), transmembrane (SP_PIR_KEYWORDS), glycoprotein (SP_PIR_KEYWORDS), signal (SP_PIR_KEYWORDS), disulfide bond (SP_PIR_KEYWORDS)	0.758639	Hematopoietic cell lineage	0.0476228	3		NA	NA		NA	NA		NA	NA	cytokine receptor activity	0.965393	2	M3.2	Inflammation	3	14.29	M37.0	immune activation - generic cluster	3	0.15
225	M15.81	A35	21	TBD	20	1732176, 1741148, 1733861, 2157510, 1659189, 1815759, 2339377, 1782748, 1765801, 1727043, 1783843, 1757072, 1660341, 2350574, 2361807, 1766275, 1775327, 1677085, 1665384, 1703370	AGPAT2, ALDOA, ARHGEF11, BLOC1S1, C9ORF89, CTDP1, DNM2, FMNL1, GAA, GLT25D1, IIP45, LOC642489, LRPAP1, MYADM, OS9, PIK3CD, PKM2, RGS19, SH3BP5L, ZDHHC12	Glycolysis/Glycolysis/Glycolysis	cellular protein modification process, neutrophil degranulation, intracellular signal transduction	link	cellular carbohydrate catabolic process (GOTERM_BP_FAT), carbohydrate catabolic process (GOTERM_BP_FAT), glucose metabolic process (GOTERM_BP_FAT), hexose metabolic process (GOTERM_BP_FAT), monosaccharide metabolic process (GOTERM_BP_FAT), generation of precursor metabolites and energy (GOTERM_BP_FAT), polymorphism (SP_PIR_KEYWORDS)	1.60661	Type II diabetes mellitus	0.92719	2		NA	NA		NA	NA	muscle contraction	0.159805	4	carbohydrate binding	0.987383	3	M7.1		8	40			NA	NA
228	M15.84	A35	1	Cytokines/chemokines	20	2365091, 1851599, 1818872, 1860008, 1896455, 1852022, 1743034, 1687960, 1674285, 1763823, 1652490, 1788002, 1711030, 1780546, 1685312, 1714650, 1801216, 1668865, 2204545, 1772387	FCAR, HS.130245, HS.163346, HS.559151, HS.572130, KIAA1881, KIF1B, LIMK2, LOC401233, LOC651612, MANSC1, MAPK14, OPLAH, OSM, PSG3, RASGRP4, S100P, SLC2A14, ST3GAL4, TLR2	MAP Kinase Signaling System/MAP Kinase Signaling System/MAP Kinase Signaling System	cytokine secretion, cellular response to organic substance, signal transduction, transcription by RNA polymerase II, neutrophil degranulation, protein phosphorylation	link	glycoprotein (SP_PIR_KEYWORDS), Secreted (SP_PIR_KEYWORDS), disulfide bond (SP_PIR_KEYWORDS), Immunoglobulin domain (SP_PIR_KEYWORDS), signal (SP_PIR_KEYWORDS), immune response (GOTERM_BP_FAT), polymorphism (SP_PIR_KEYWORDS), membrane (SP_PIR_KEYWORDS), transmembrane (SP_PIR_KEYWORDS)	1.1248		NA	NA	NFkB activation by Nontypeable Hemophilus influenzae	0.365392	2		NA	NA	protein kinase cascade	0.999965	3		NA	NA	M4.2	Inflammation	6	30	M37.0	immune activation - generic cluster	4	0.2
249	M15.105	A35	8	Inflammation	16	1715635, 2071937, 2339779, 1771815, 1679428, 1656621, 1737604, 2220518, 1727402, 2312340, 1779010, 1719403, 2068747, 1748651, 1760347, 1746588, 1778977	ATP6V0E1, ATP6V0E1, ATP6V1E1, C20ORF43, CHIC2, CHMP2A, FLJ10986, HBXIP, HCLS1, LILRB2, MAP3K3, MTX1, OAT, PSMB3, SRGN, TALDO1, TYROBP	Metabolic Networks and Pathways/Monocyte Surface/Proton-Translocating ATPases	protein metabolic process, signal transduction, protein transport, exocytosis	link	acetylation (SP_PIR_KEYWORDS), cytoplasm (SP_PIR_KEYWORDS)	0.830586	Vibrio cholerae infection	0.684148	2		NA	NA		NA	NA	energy coupled proton transport, against electrochemical gradient	0.892805	2	proton-transporting ATPase activity, rotational mechanism	0.541769	2	M5.1	Inflammation	7	41.18	M4.0	cell cycle and transcription	2	0.125
253	M15.109	A35	9	Inflammation	17	2295252, 2388112, 1728677, 1681520, 1706523, 1763745, 1652003, 1689734, 1754753, 1767809, 1803479, 1753111, 1664525, 2363591, 1705047, 1812915, 2189037	C9ORF72, CR1, CREB5, DGAT2, FCGR2A, FLJ14166, GNG10, IL1RN, IL6R, LOC552891, LOC650546, NAMPT, P2RY13, SDCBP, TLR8, TNFRSF10B, WDR52	Etanercept/Etanercept/Nicotinic acid	signal transduction	link	receptor (SP_PIR_KEYWORDS), inflammatory response (GOTERM_BP_FAT), leukocyte mediated immunity (GOTERM_BP_FAT), immune effector process (GOTERM_BP_FAT), response to wounding (GOTERM_BP_FAT), defense response (GOTERM_BP_FAT), transmembrane protein (SP_PIR_KEYWORDS), immune response (GOTERM_BP_FAT), positive regulation of response to stimulus (GOTERM_BP_FAT), positive regulation of immune system pr…	1.77735		NA	NA		NA	NA	A Genome-Wide Association Study Identifies Protein Quantitative Trait Loci (pQTLs)	0.422346	2	inflammatory response	0.342373	4	protein dimerization activity	0.991143	3	M3.2	Inflammation	5	29.41	S4	Monocyte surface signature	4	0.235294
257	M15.113	A35	5	Inflammation	16	1687609, 1796138, 1689829, 1724236, 1722524, 1886963, 1810584, 1764456, 1798458, 1654389, 1737627, 2260082, 1760189, 1708881, 2395827, 1781001, 1766896	AATK, BMX, DNAH5, FUT7, GALNT14, HS.246177, IL1R1, KIAA0329, KIAA1026, LOC728744, MAPK14, NAIP, NAIP, RAB20, RASGRP4, SOCS3, ZDHHC19	Antirheumatic Agents/IL 1/Interleukin-1alpha	cellular protein modification process, cell surface receptor signaling pathway, intracellular signal transduction	link	transferase (SP_PIR_KEYWORDS), nucleotide-binding (SP_PIR_KEYWORDS), polymorphism (SP_PIR_KEYWORDS), atp-binding (SP_PIR_KEYWORDS), intracellular signaling cascade (GOTERM_BP_FAT), purine ribonucleotide binding (GOTERM_MF_FAT), ribonucleotide binding (GOTERM_MF_FAT), purine nucleotide binding (GOTERM_MF_FAT), small GTPase mediated signal transduction (GOTERM_BP_FAT), ATP binding (GOTERM_MF_FAT), …	1.39478	MAPK signaling pathway	0.710811	3	Signal transduction through IL1R	0.693606	2		NA	NA	intracellular signaling cascade	0.942586	5	purine ribonucleotide binding	0.673241	6	M4.2	Inflammation	3	17.65	M37.0	immune activation - generic cluster	3	0.1875
350	M16.79	A35	14	Protein synthesis	27	1687971, 1678454, 1672759, 1790973, 1693014, 1770290, 1769926, 2333865, 1789642, 2129927, 2122374, 1705743, 1802252, 1746171, 1651496, 1673352, 1767360, 2266595, 1692260, 1803925, 1725187, 2128750, 1684440, 2398274, 1731484, 1753342, 1704290	CAPN3, CASP4, CCDC109A, CDS2, CEBPB, CNN2, DBN1, DNAJB12, DNAJC5, EXT1, FAM49B, FLJ10357, GAPDH, H2AFY, HIST1H2BD, IFITM2, IL10RB, LILRA5, MAFG, MTMR3, PITPNM2, PTTG1IP, PXN, PYCARD, RHOT1, SAT1, SPTLC2	Reverse Transcription/Reverse Transcription/Cytochalasin D	protein-containing complex assembly, response to other organism, proteolysis, cellular protein modification process, phospholipid biosynthetic process, cellular response to stress, transcription by RNA polymerase II, cell surface receptor signaling pathway, intracellular signal transduction, cellular response to chemical stimulus, macroautophagy	link	acetylation (SP_PIR_KEYWORDS), cytoskeletal protein binding (GOTERM_MF_FAT)	1.21047		NA	NA		NA	NA		NA	NA	actomyosin structure organization	0.999992	2	cysteine-type endopeptidase activity	0.404976	3	M4.6	Inflammation	4	14.81	M37.0	immune activation - generic cluster	2	0.0740741
369	M16.98	A35	15	TBD	18	1703946, 1664047, 1767193, 1653203, 2092333, 1653648, 1893697, 1770927, 1772697, 1680887, 1660227, 1733515, 2209115, 2138589, 2394210, 1672575, 1686454, 2319952, 1668847	ADORA2B, CACNA1E, CR1, EFEMP2, GPR141, GPR63, HS.162734, KIAA1026, KREMEN1, LOC643550, LOC646434, LOXL3, MAK, MERTK, SLC26A8, SLC26A8, TIFA, VDR, WWP2	Osteoporosis/Tropoelastin/Elastin	signal transduction, ion transmembrane transport, cellular protein modification process	link	glycoprotein (SP_PIR_KEYWORDS), receptor (SP_PIR_KEYWORDS), transmembrane (SP_PIR_KEYWORDS), cell surface receptor linked signal transduction (GOTERM_BP_FAT), g-protein coupled receptor (SP_PIR_KEYWORDS), transducer (SP_PIR_KEYWORDS), membrane (SP_PIR_KEYWORDS), G-protein coupled receptor protein signaling pathway (GOTERM_BP_FAT), cell membrane (SP_PIR_KEYWORDS), alternative splicing (SP_PIR_KEYW…	1.12202		NA	NA		NA	NA		NA	NA	cellular response to extracellular stimulus	1	2		NA	NA	M4.2	Inflammation	2	10.53	M37.0	immune activation - generic cluster	2	0.111111
